# Supplementary material for: Phosphodiesterase-5 inhibition collaborates with vaccine-based immunotherapy to reprogram myeloid cells in pancreatic ductal adenocarcinoma
Source: PubMed Central journal article supplement (PMC11457845; doi:10.1172/jci.insight.179292), 2024-08-06
Supplement: jciinsight-9-179292-s015.pdf [file jciinsight-9-179292-s015.pdf]

## Supplemental Tables

### Supplemental Table 1. Mass cytometry profiling panel

| Mass    | Metal | Antigen                     | Clone       | Dilution Factor | Source              | Catalogue      | Custom |
|---------|-------|-----------------------------|-------------|-----------------|---------------------|----------------|--------|
| 89      | Y     | PDPN                        | 8.1.8       | 200             | Biolegend®          | 127402         | X      |
| 103     | Rh    | Cell-ID Intercalator-103 Rh | N/A         | 500             | Standard Biotoools™ | 201103A        |        |
| 106     | Cd    | CD31                        | 390         | 200             | Biolegend®          | 102401         | X      |
| 110     | Cd    | CD90                        | G7          | 400             | Biolegend®          | 105202         | X      |
| 112     | Cd    | CD45                        | 30-F11      | 200             | Biolegend®          | 103102         | X      |
| 113     | Cd    | CD45                        | 30-F11      | 200             | Biolegend®          | 103102         | X      |
| 114     | Cd    | CD45                        | 30-F11      | 200             | Biolegend®          | 103102         | X      |
| 115     | In    | CD45                        | 30-F11      | 200             | Biolegend®          | 103102         | X      |
| 116     | Cd    | CD45                        | 30-F11      | 200             | Biolegend®          | 103102         | X      |
| 141     | Pr    | Ly6G                        | 1A8         | 50              | Standard Biotoools™ | 3141008B       |        |
| 142     | Nd    | CD11c                       | N418        | 100             | Standard Biotoools™ | 3142003B       |        |
| 143     | Nd    | CD69                        | H1.2F3      | 200             | Standard Biotoools™ | 3143004B       |        |
| 144     | Nd    | CD45R/B220                  | RA3-6B2     | 200             | Standard Biotoools™ | 3144011B       |        |
| 145     | Nd    | CD4                         | RM4-5       | 200             | Standard Biotoools™ | 3145002B       |        |
| 146     | Nd    | F4/80                       | BM8         | 100             | Standard Biotoools™ | 3146008B       |        |
| 147     | Sm    | CD45                        | 30-F11      | 100             | Standard Biotoools™ | 3147003B       |        |
| 148     | Nd    | CD11b                       | M1/70       | 100             | Standard Biotoools™ | 3148003B       |        |
| 149     | Sm    | CD19                        | 6D5         | 100             | Standard Biotoools™ | 3149002B       |        |
| 150     | Nd    | Ly6C                        | HK1.4       | 100             | Standard Biotoools™ | 3150010B       |        |
| 151     | Eu    | CD25                        | 3C7         | 100             | Standard Biotoools™ | 3151007B       |        |
| 152     | Sm    | CD3e                        | 145-2C11    | 50              | Standard Biotoools™ | 3152004B       |        |
| 153     | Eu    | CD274/PD-L1                 | 10F.9G2     | 100             | Standard Biotoools™ | 3153031B       |        |
| 154     | Sm    | CD152/CTLA-4                | UC10-4B9    | 100             | Standard Biotoools™ | 3154008B       |        |
| 155     | Gd    | CD134 (OX-40)               | OX-86       | 100             | Biolegend®          | 119430         | X      |
| 156     | Gd    | FAP                         | 983810      | 100             | R&D Systems™        | MAB97271-100   | X      |
| 158     | Gd    | KLRG1                       | 2F1         | 400             | Sigma-Aldrich®      | MABF467        | X      |
| 159     | Tb    | PD1                         | 29F.1A12    | 100             | Standard Biotoools™ | 3159024B       |        |
| 160     | Gd    | Tbet                        | 4B10        | 100             | Standard Biotoools™ | 3160010B       |        |
| 161     | Dy    | CD40                        | HM40-3      | 50              | Standard Biotoools™ | 3161020B       |        |
| 162     | Dy    | KI67                        | B56         | 200             | Standard Biotoools™ | 3162012B       |        |
| 163     | Dy    | CD86                        | GL-1        | 400             | Biolegend®          | 105002         | X      |
| 164     | Dy    | CD62L                       | MEL14       | 100             | Standard Biotoools™ | 3164003B       |        |
| 165     | Ho    | Foxp3                       | FJK-16s     | 33              | Standard Biotoools™ | 3165024A       |        |
| 167     | Er    | EOMES                       | Dan11mag    | 200             | eBioscience™        | 14-4875-82     | X      |
| 168     | Er    | CD8a                        | 53-6.7      | 50              | Standard Biotoools™ | 3168003B       |        |
| 169     | Tm    | CD206                       | C068C2      | 100             | Standard Biotoools™ | 3169021B       |        |
| 170     | Er    | NK1.1                       | PK136       | 50              | Standard Biotoools™ | 3170002B       |        |
| 171     | Yb    | CD44                        | IM7         | 300             | Standard Biotoools™ | 3171003B       |        |
| 172     | Yb    | CD137                       | 17B5        | 50              | Biolegend®          | 106114         | X      |
| 173     | Yb    | Granzyme B                  | GB11        | 66              | Standard Biotoools™ | 3173006B       |        |
| 174     | Yb    | CD223/Lag3                  | C9B7W       | 100             | Standard Biotoools™ | 3174019B       |        |
| 175     | Lu    | MSLN/Mesothelin             | B35         | 100             | LS Bio              | LS-C179484-100 | X      |
| 176     | Yb    | CD278/ICOS                  | 7E.17G9     | 400             | Standard Biotoools™ | 3176014B       |        |
| 194-198 | Pt    | Cell-ID Cisplatin           | N/A         | 1000            | Standard Biotoools™ | 201064         |        |
| 209     | Bi    | I-A/I-E (MHCII)             | M5/114.15.2 | 100             | Standard Biotoools™ | 3209006B       |        |

**Supplemental Table 2. Estimated cell counts and mean reads per cell by sample for single cell RNA sequencing**

| Sample    | Treatment | Estimated Number of Cells | Mean Reads per Cell |
|-----------|-----------|---------------------------|---------------------|
| G1mus1    | VEH       | 3,293                     | 240,012             |
| G1mus2    | VEH       | 5,819                     | 134,615             |
| G1mus3    | VEH       | 9,764                     | 85,291              |
| G2mus1    | TAD       | 7,564                     | 97,045              |
| G2mus2    | TAD       | 7,010                     | 111,388             |
| G2mus3rep | TAD       | 9,759                     | 53,353              |
| G3mus1    | CLIST     | 8,076                     | 98,643              |
| G3mus2    | CLIST     | 22,741                    | 38,090              |
| G3mus3    | CLIST     | 6,863                     | 98,577              |
| G4mus1    | MLIST     | 2,366                     | 294,947             |
| G4mus2    | MLIST     | 6,189                     | 107,831             |
| G4mus3    | MLIST     | 31,210                    | 16,553              |
| G5mus1    | MLIST.TAD | 4,454                     | 143,383             |
| G5mus2    | MLIST.TAD | 7,680                     | 66,938              |
| G5mus3    | MLIST.TAD | 4,442                     | 110,061             |

## Supplemental Figures

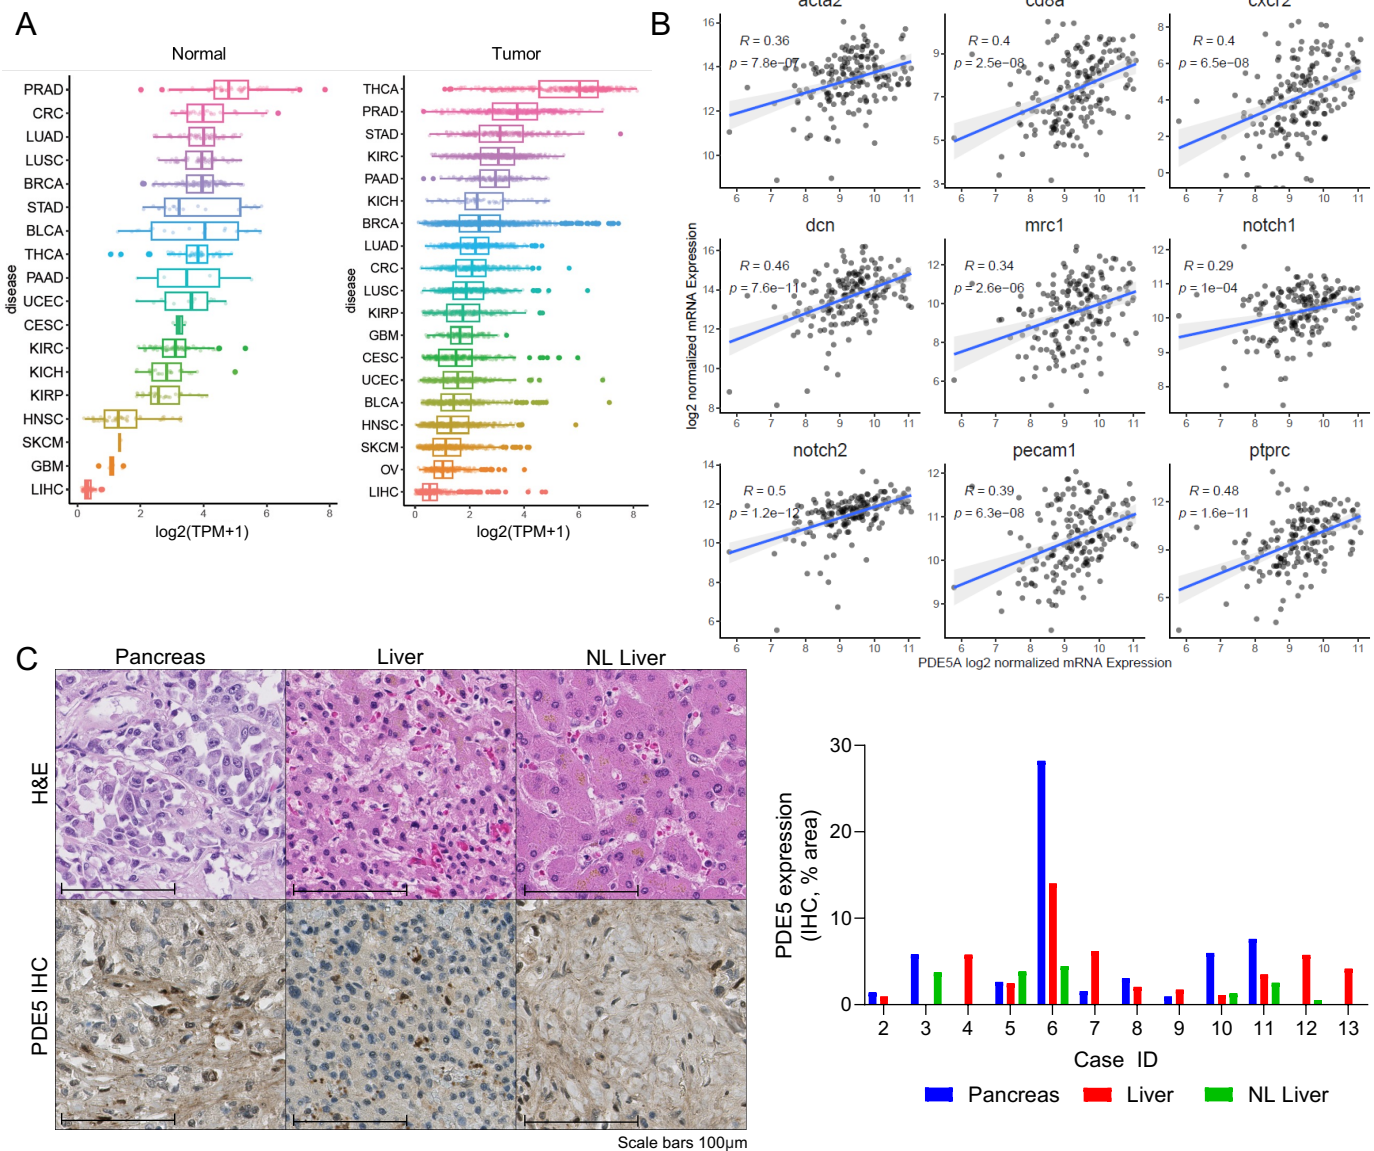

**Supplemental Figure 1. Characterization of PDE5 expression in human PDAC.** **A)** Boxplots showing Log<sub>2</sub>-transformed transcripts per million (TPM) of PDE5A expression in human tissue samples across 19 cancer types and 18 normal tissues. Transcriptome data were derived from The Cancer Genome Atlas (TCGA) Portal. PRAD= prostate adenocarcinoma, CRC= colorectal carcinoma, LUAD= lung adenocarcinoma, LUSC= lung squamous cell carcinoma, BRCA= breast invasive carcinoma, STAD= stomach adenocarcinoma, BLCA= bladder urothelial carcinoma, THCA= thyroid carcinoma, PAAD= pancreatic adenocarcinoma, UCEC= uterine corpus endometrial carcinoma, CESC= cervical squamous cell carcinoma and endocervical adenocarcinoma, KIRC= kidney renal clear cell carcinoma, KICH= kidney chromophobe, KIRP= kidney renal papillary cell carcinoma, HNSC= head and neck squamous cell carcinoma, SKCM= skin cutaneous melanoma, GBM= glioblastoma multiforme, LIHC= liver hepatocellular carcinoma, OV= ovarian serous cystadenocarcinoma. **B)** Scatter plots displaying associations between PDE5A log<sub>2</sub> normalized mRNA expression and that of various mRNAs. Pearson correlation coefficient was calculated to measure linear correlation. **C)** Representative H&E and PDE5 stained IHC images from 12 human primary pancreas and metastatic liver samples (10 matching), and normal liver tissue samples. Scale bars are 100  $\mu$ m. Bar plots quantifying the density of PDE5 positively stained tissue area across case IDs.

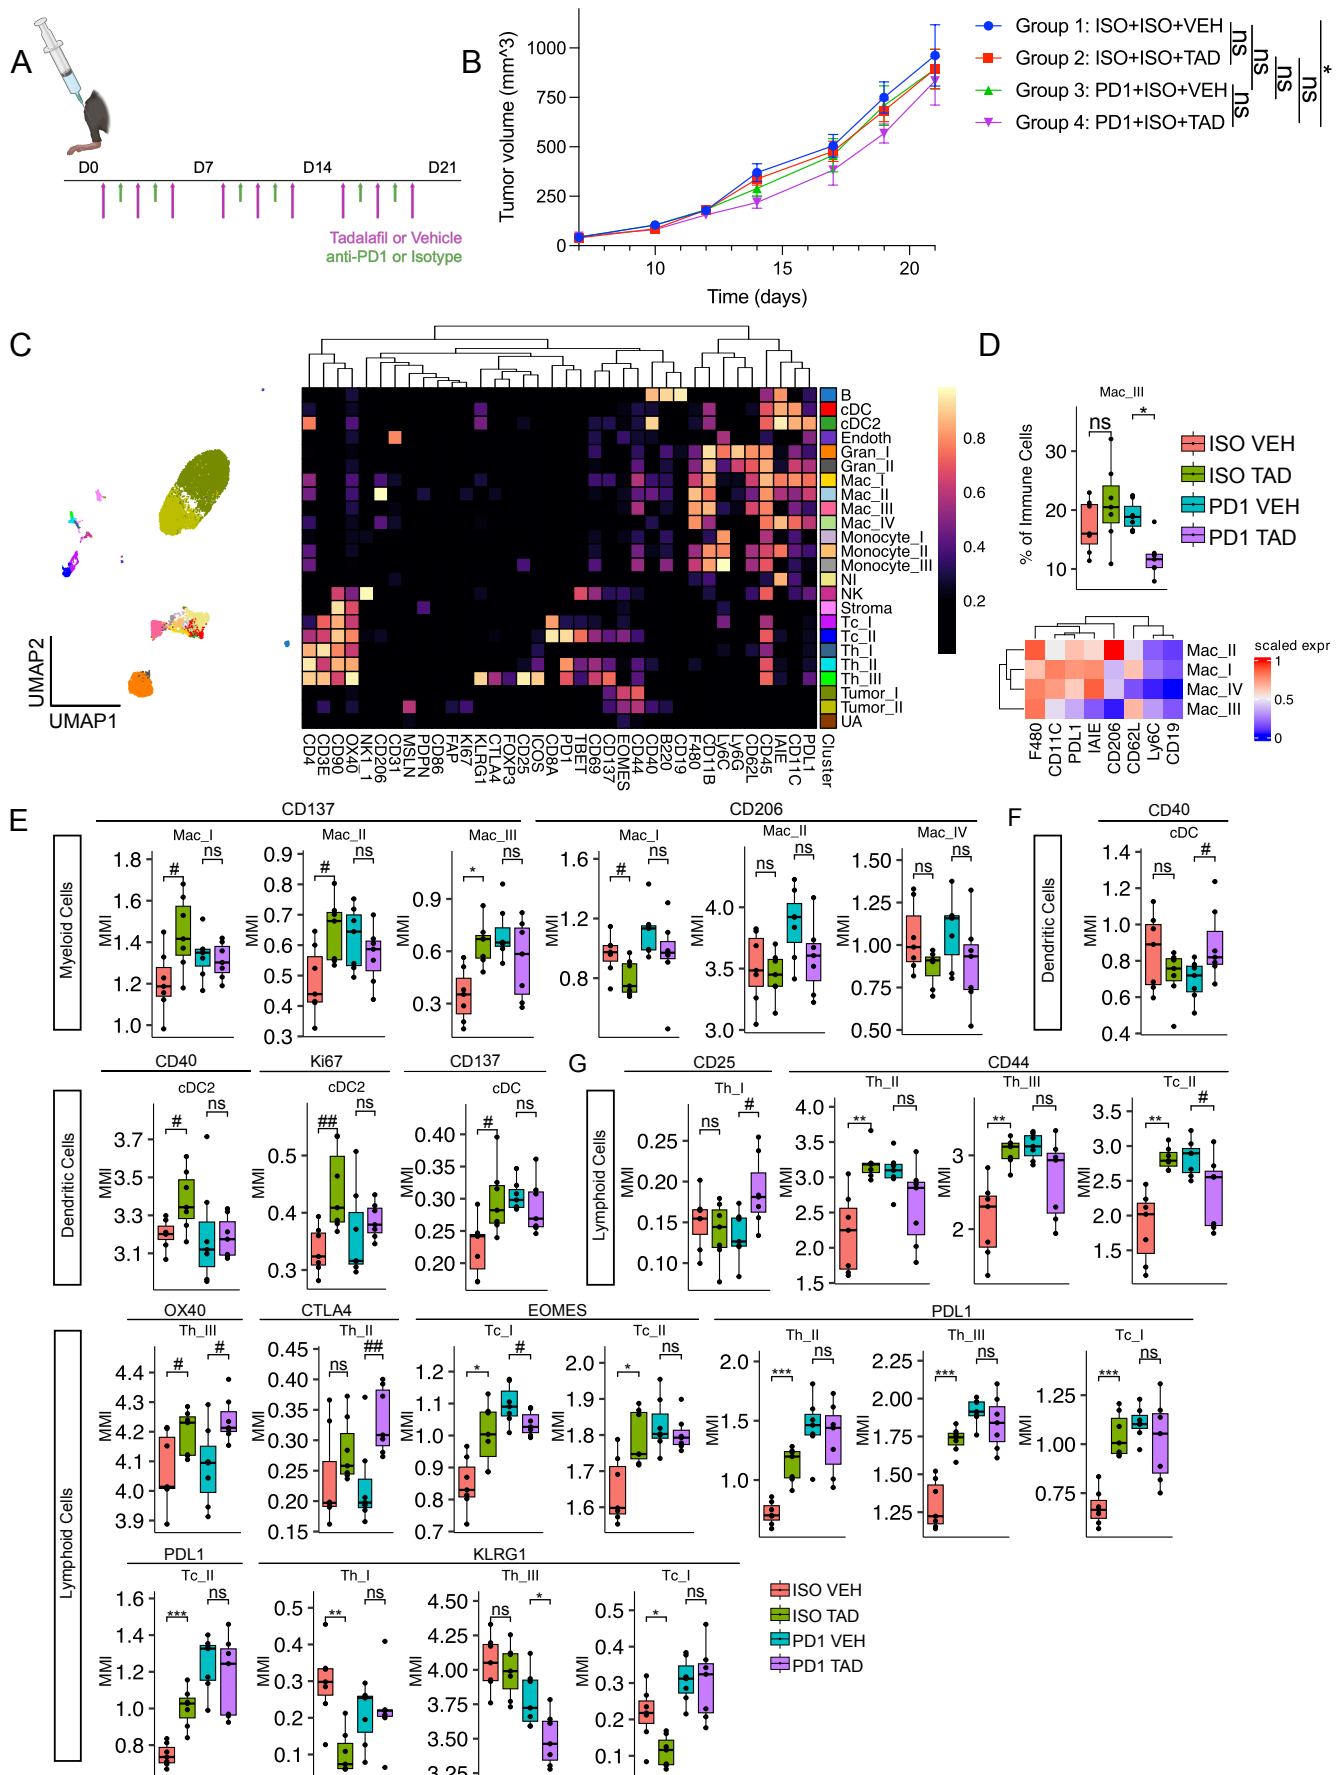

**Supplemental Figure 2 Deep profiling of myeloid, dendritic, and lymphoid cells by CyTOF in subcutaneous KPCY 2838c3 model. A) Mice were injected with KPCY 2838c3 cells subcutaneously in the right**



hind limb on day 0 then treated intravenously with tadalafil or PBS 3 times per week and intraperitoneally with anti-PD1 or isotype 2 times per week until day 21. **B)** Tumor volumes ( $\text{mm}^3$ ) were measured 3 times per week starting on day 10 and plotted over time for each treatment group. Mean  $\pm$  SEM (n= 7) **C)** UMAP visualization of annotated cell clusters with 2,000 cells per sample shown and heatmap of final annotated clusters based on relative staining intensities of canonical subtyping markers. B = B cell, cDC = classical dendritic cell, Endoth = endothelial cell, Gran = granulocyte, Mac = macrophage, NI = non-immune, NK = natural killer cell, Tc = cytotoxic T cell, Th = helper T cell, UA = unassigned. **D)** Boxplots showing abundances of IAIE- Macrophage subtype calculated as a percent of all CD45+ cells (n=7). Clustering heatmap showing macrophage subsets based on relative staining intensities of canonical subtyping markers. Mac = macrophage. **E-G)** Boxplots showing mean metal intensity (MMI) of selected functional markers within selected clusters (n=14). For FDR adjusted p values: ns > 0.05, \*P  $\leq$  0.05, \*\*P  $\leq$  0.001, \*\*\*P  $\leq$  0.001, \*\*\*\*P  $\leq$  0.0001, for unadjusted p values: #P  $\leq$  0.05, ##P  $\leq$  0.001, ###P  $\leq$  0.001, ####P  $\leq$  0.0001 by two-tailed Student's T test between groups of interest.

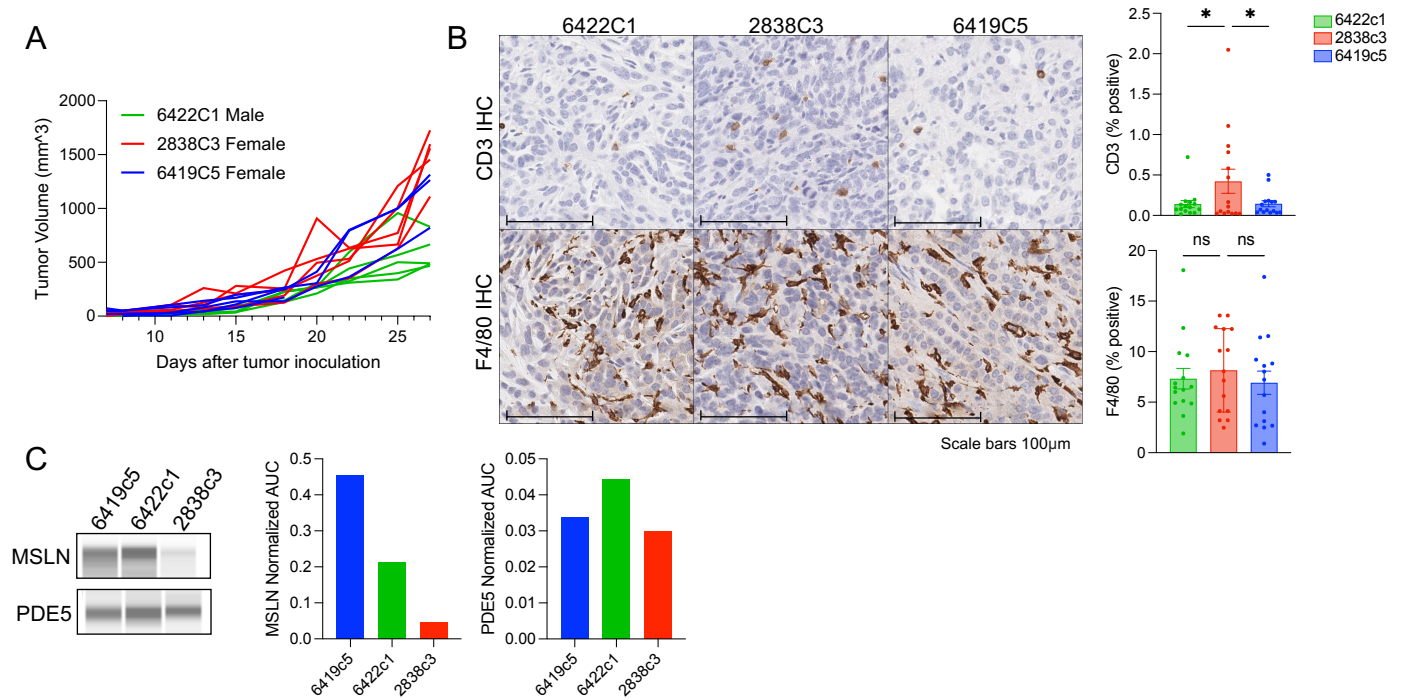

**Supplemental Figure 3. Characterization of murine PDAC models.** **A)** Tumor volumes (mm<sup>3</sup>) of subcutaneous tumors from 6422c1, 2838c3, and 6419c5 cell lines were measured 3 times per week starting on day 0 and plotted over time for each model for 27 days (n=5). **B)** Representative images and bar graphs of positively stained area for CD3 and F4/80 IHC stains from subcutaneous 6422c1, 2838c3, and 6419c5 tumors. Data represent 3 biological replicates with 5 high powered field images per replicate with mean  $\pm$  SEM shown. \* $P \leq 0.05$  by two-tailed Student's T test between groups of interest. **C)** Immunoblot analysis via capillary-based separation of mesothelin (MSLN) and PDE5 expression from 6419c5, 6422c1, and 2838c3 cell lysates with area under the curve (AUC) normalized by total protein plotted for each lane.

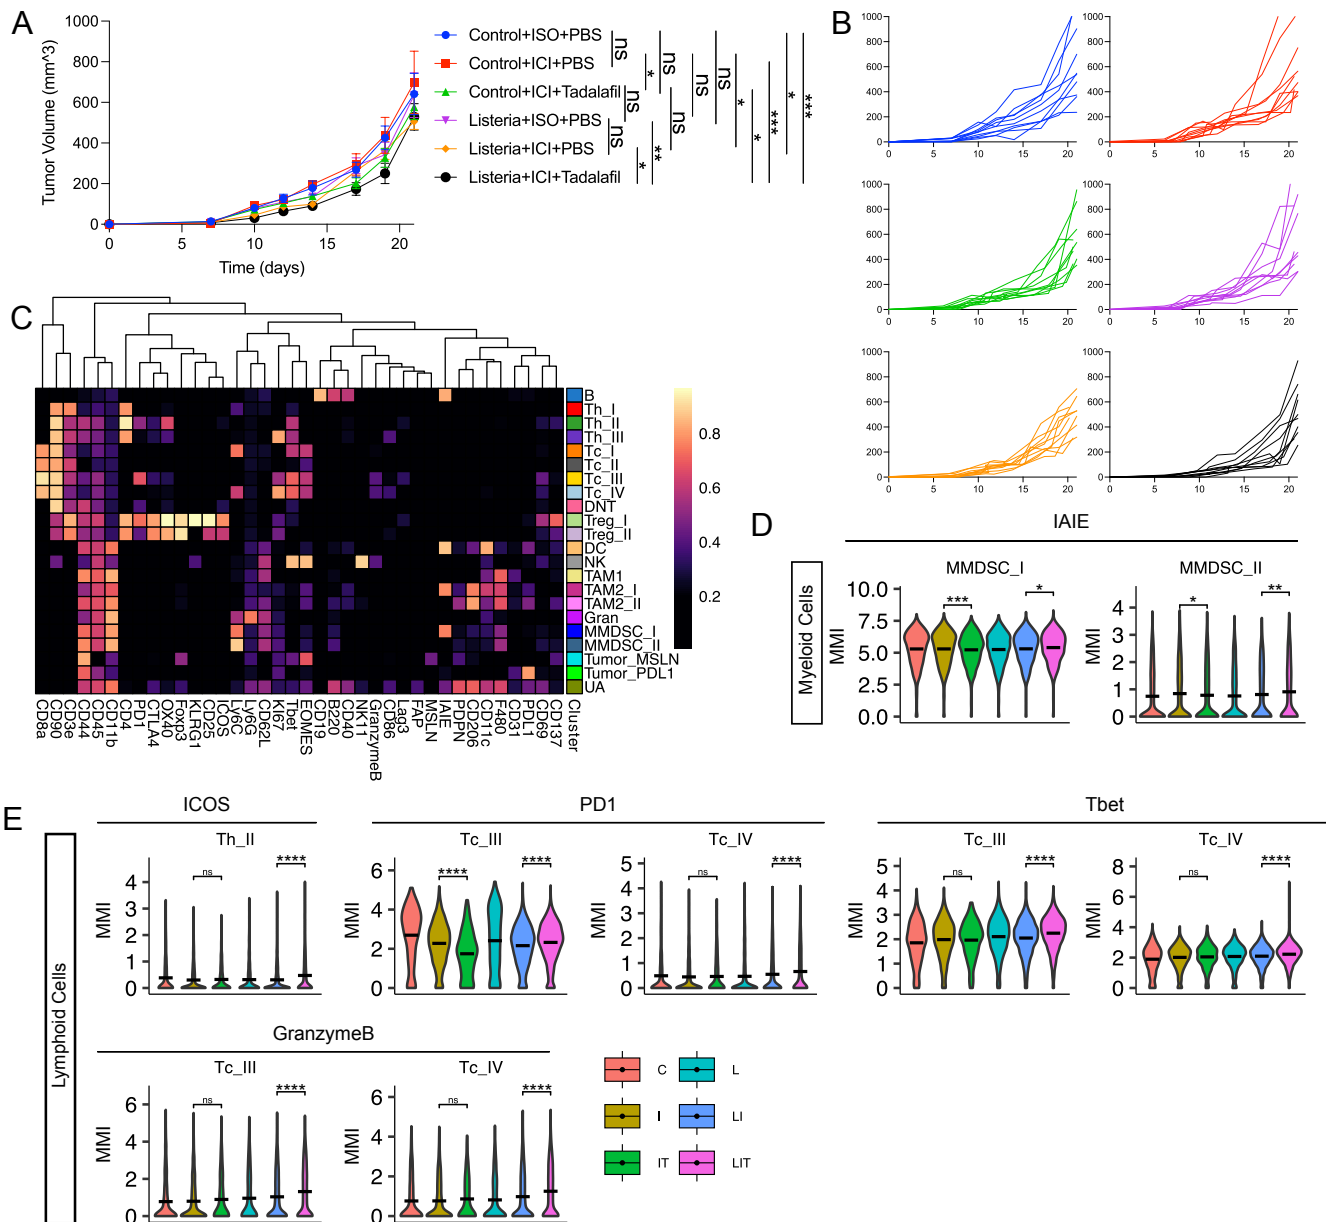

**Supplemental Figure 4. Deep profiling of myeloid, dendritic, and lymphoid cells by CyTOF in subcutaneous KPCY 6422c1 model.** **A)** Tumor volumes (mm<sup>3</sup>) were measured 3 times per week starting on day 10 and plotted over time for each treatment group. Plot is representative of 2 independent runs. Mean  $\pm$  SEM (n= 10). ns > 0.05, \*P  $\leq$  0.05, \*\*P  $\leq$  0.001, \*\*\*P  $\leq$  0.001, \*\*\*\*P  $\leq$  0.0001 by nonlinear regression. **B)** Tumor volumes plotted individually by treatment group. **C)** Heatmap of final annotated clusters based on relative staining intensities of canonical subtyping markers. B = B cell, Th = helper T cell, Tc = cytotoxic T cell, DNT= double negative T cell, Treg= regulatory T cell, DC = dendritic cell, NK = natural killer cell, TAM = tumor associated macrophage, Gran = granulocyte, MMDSC = monocytic myeloid derived suppressor cell, UA = unassigned. **D-E)** Violin plots showing mean metal intensity (MMI) of selected functional markers within selected clusters. C = control, I = ICIs (anti-PD1 & anti-CTLA-4), IT = ICIs + tadalafil, L = Listeria vaccine, LI = Listeria vaccine + ICIs, LIT = Listeria vaccine + ICIs + tadalafil. For FDR adjusted p values: ns > 0.05, \*P  $\leq$  0.05, \*\*P  $\leq$  0.001, \*\*\*P  $\leq$  0.001, \*\*\*\*P  $\leq$  0.0001 by two-tailed Student's T test between groups of interest.

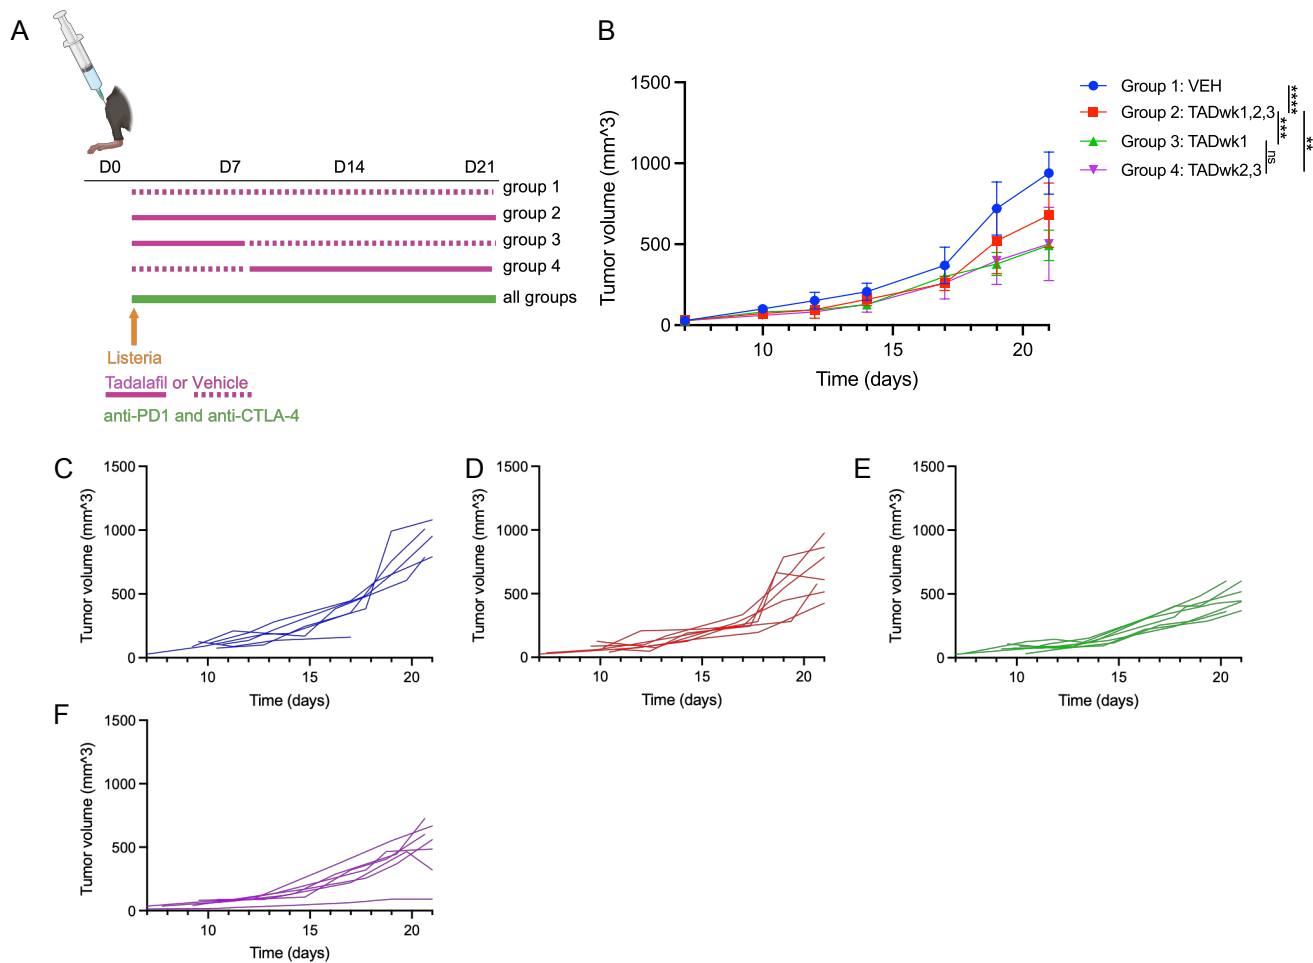

**Supplemental Figure 5. The addition of tadalafil to ICIs and mesothelin expressing *Listeria* vaccine diminishes tumor growth.** **A)** Mice were injected with KPCY 6419c5 cells subcutaneously in the right hind limb on day 0 then vaccinated with mesothelin expressing *Listeria* vaccine on day 3. Mice were treated intravenously with tadalafil or vehicle 3 times per week and intraperitoneally with anti-PD1 & anti-CTLA-4 2 times per week until day 21. All groups received mesothelin expressing *Listeria* vaccine, anti-PD1, and anti-CTLA-4. Group 1 received only vehicle, group 2 received only tadalafil, group 3 received tadalafil for 1 week and vehicle for the following 2 weeks, and group 4 received vehicle for 1 week and tadalafil for the following 2 weeks. **B)** Tumor volumes (mm<sup>3</sup>) were measured 3 times per week starting on day 10 and plotted over time for each treatment group. Mean  $\pm$  SEM (n= 7). ns > 0.05, \*P  $\leq$  0.05, \*\*P  $\leq$  0.001, \*\*\*P  $\leq$  0.001, \*\*\*\*P  $\leq$  0.0001 by nonlinear regression. **C-H)** Tumor volumes plotted individually by treatment group.

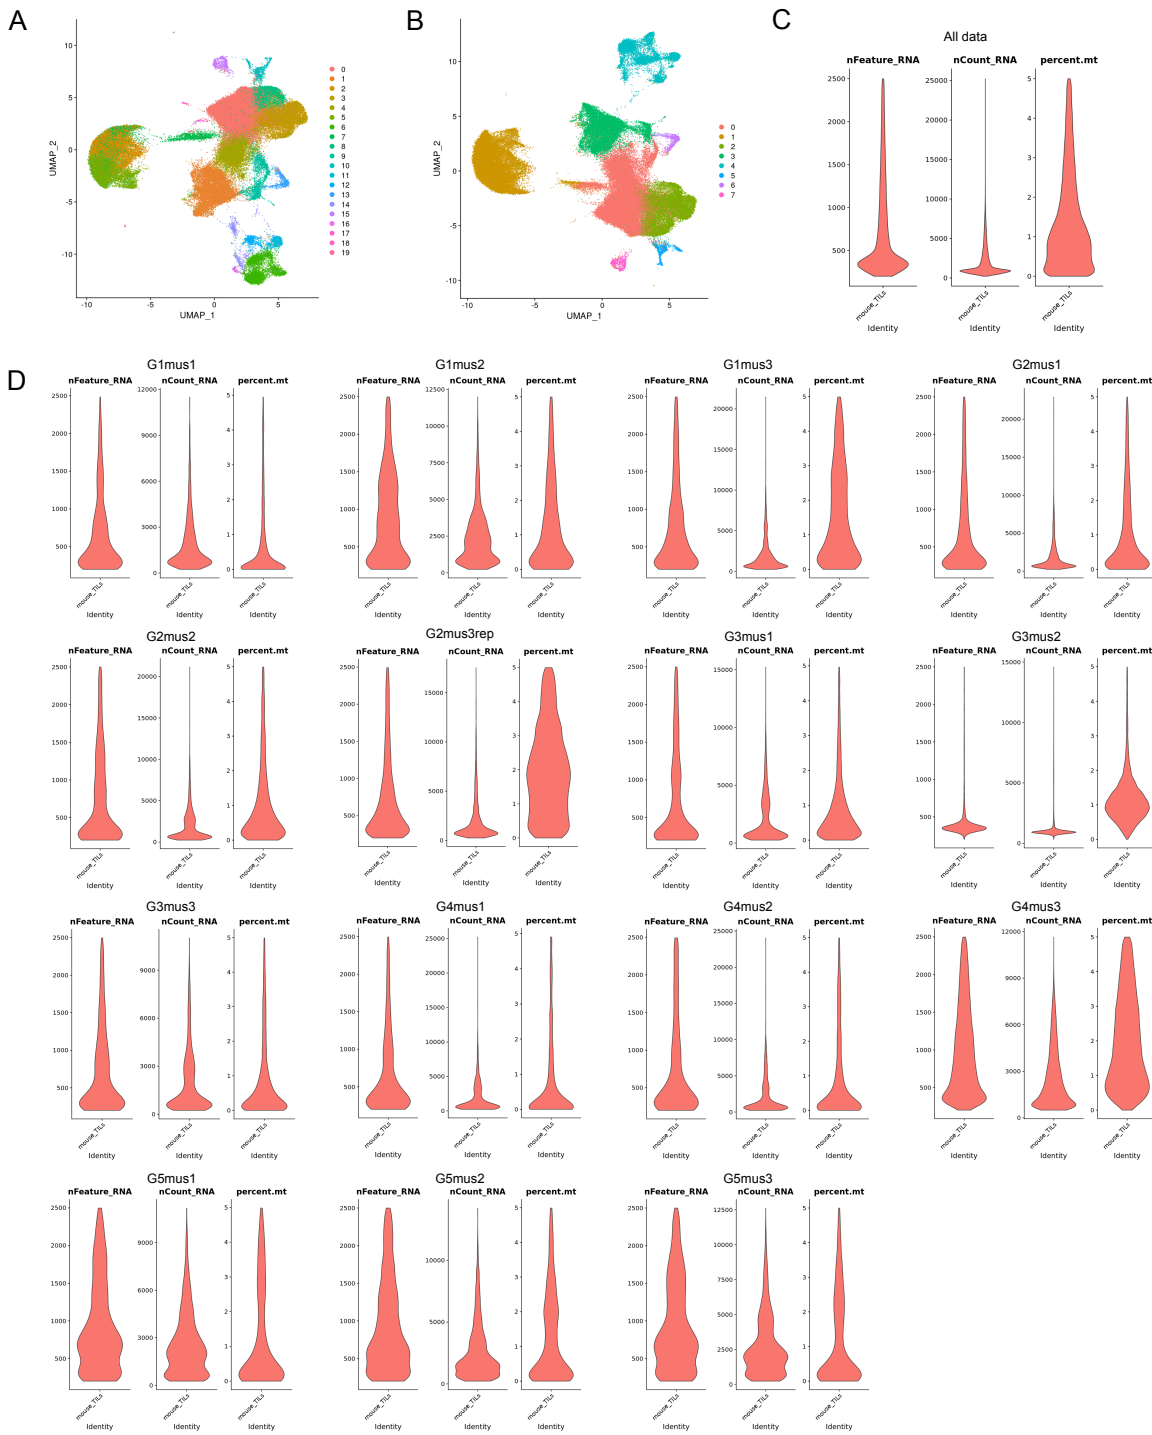

**Supplemental Figure 6. scRNAseq quality control. A)** Uniform Manifold Approximation and Projection (UMAP) before and **B)** after removing singletons and clusters less than 16 cells. **C)** Violin plots showing unique genes, gene counts, and percent mitochondrial RNA for the total dataset and **D)** per sample.

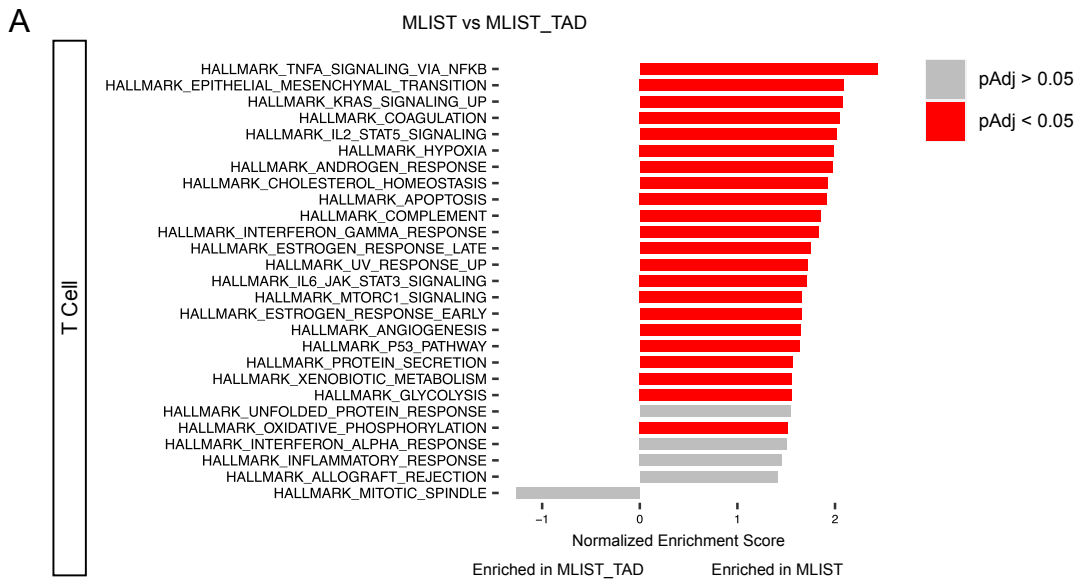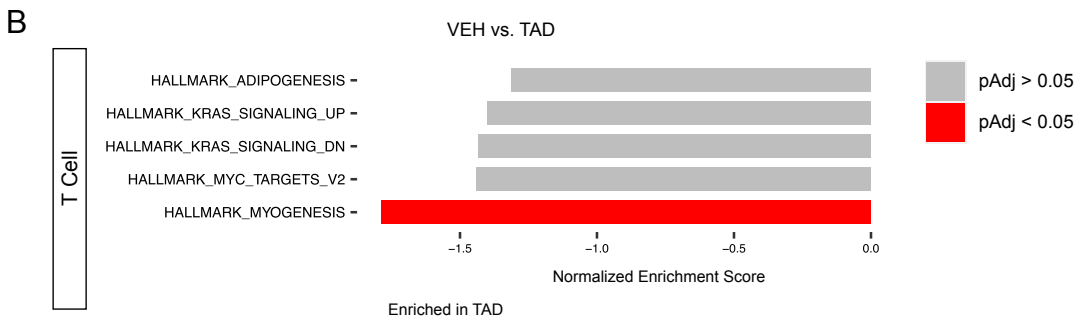

**Supplemental Figure 7. Gene set enrichment for T cells. A)** Gene set enrichment analysis showing differentially enriched gene sets from the Hallmark database in MLIST vs MLIST\_TAD and **B)** VEH vs TAD (n=3). VEH = vehicle, TAD = tadalafil, MLIST = mesothelin listeria, MLIST\_TAD = mesothelin listeria + tadalafil.

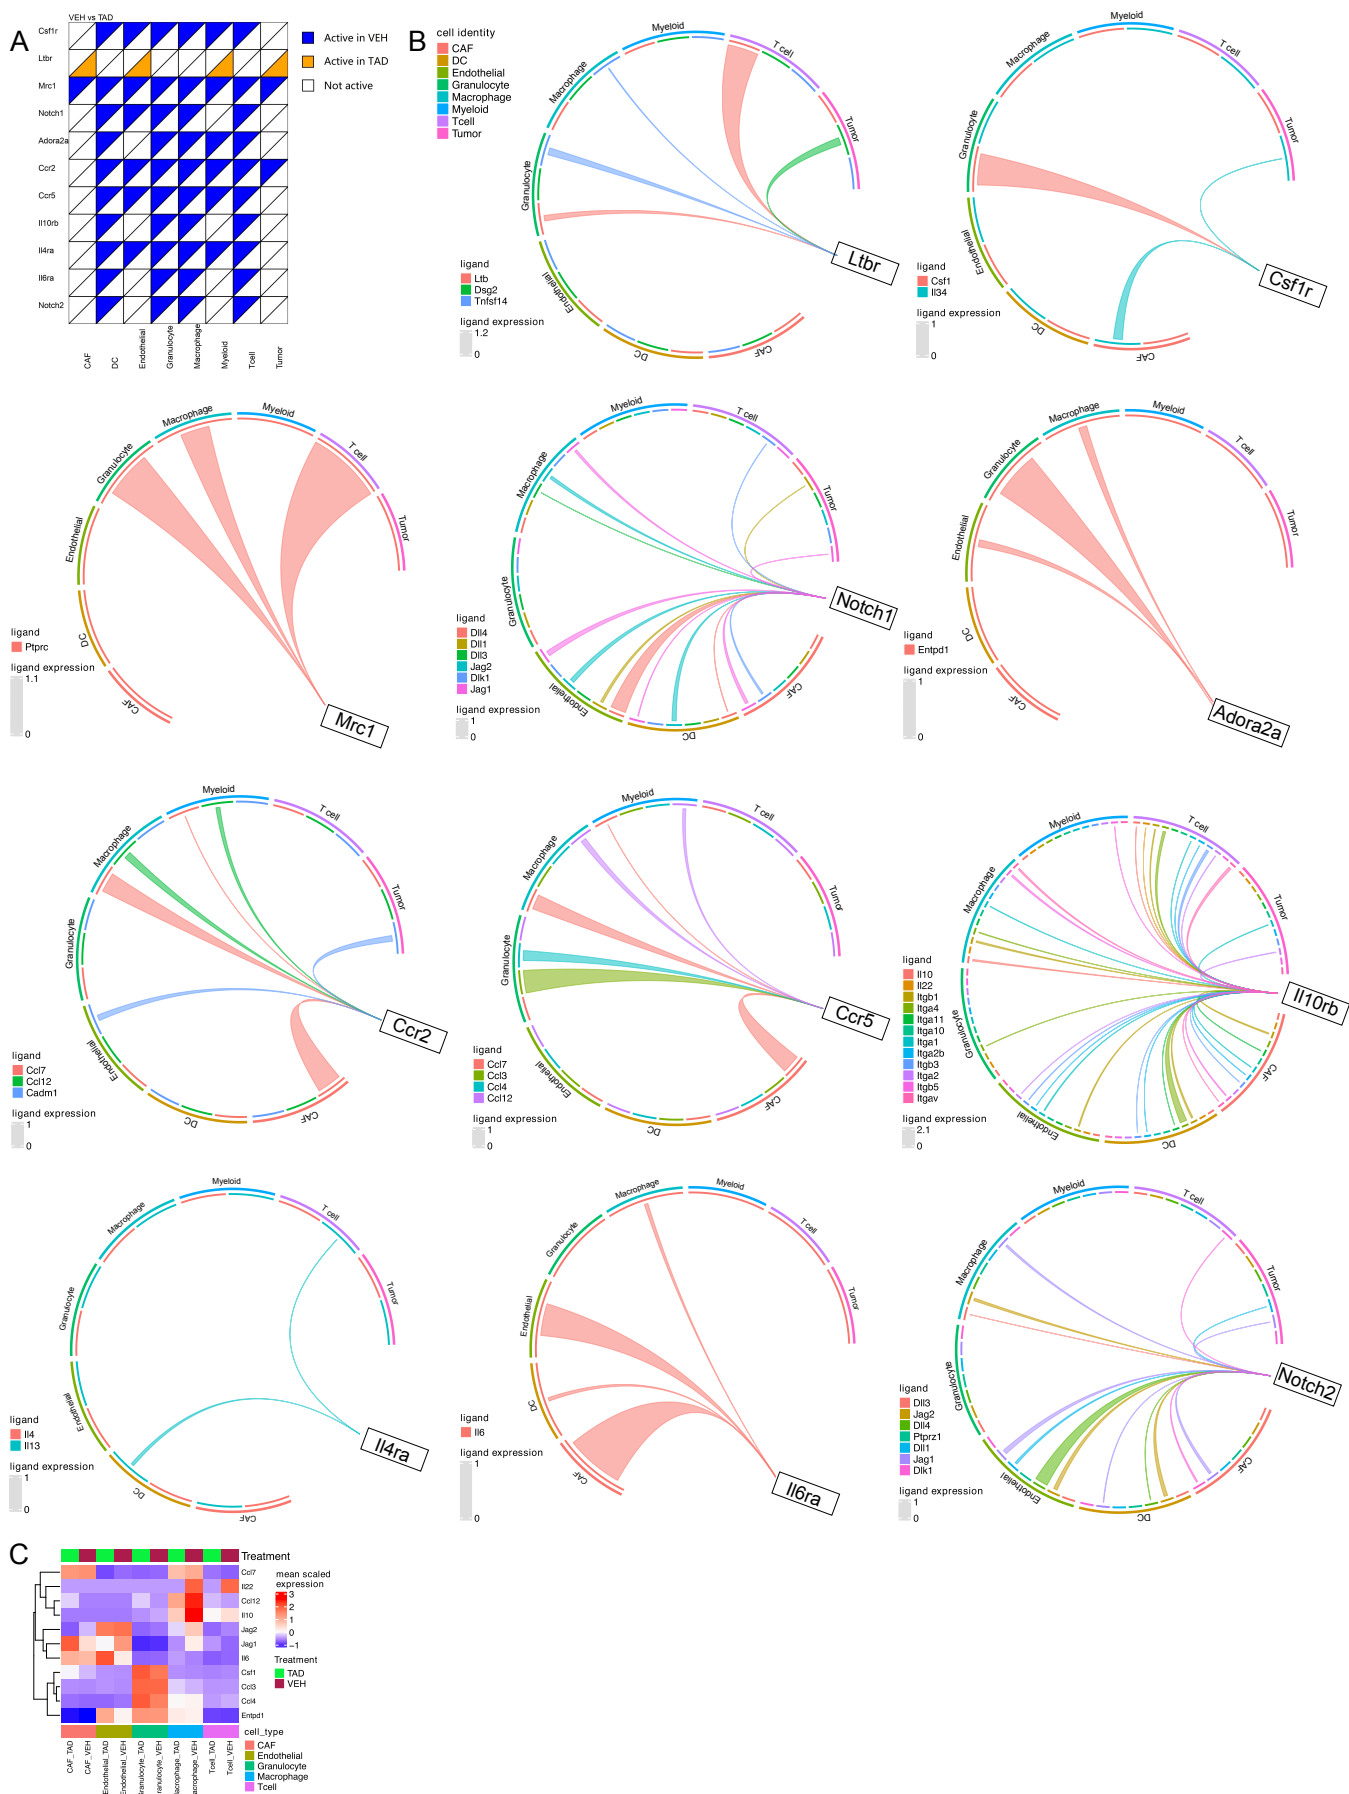



correlate to ligand expression levels; thicker lines correspond to higher expression. **C)** Heatmap showing expression levels of selected ligands in cancer associated fibroblasts (CAFs), endothelial cells, granulocytes, macrophages, and T cells.

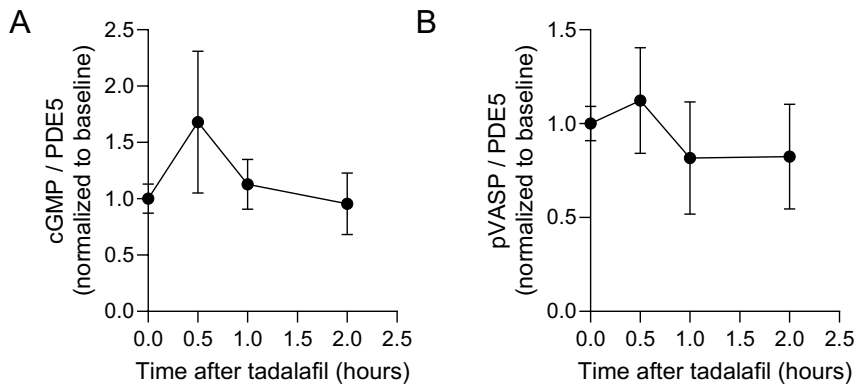

**Supplemental Figure 9. Validation of *in vivo* tadalafil inhibition. A)** Quantification of cGMP and **B)** phospho-VASP relative to PDE5 in subcutaneous tumors at 0, 0.5, 1, 1.5, and 2 hours post IP injection of tadalafil (n=3). Data represent mean  $\pm$  SEM.
